# Supplementary material
Source: publisher figshare collection journal article supplement (https://frontiersin.figshare.com/ndownloader/files/24452228)
Supplement: Supplementary file 1 [file 24452228]

Supplementary materials

Figure S1.

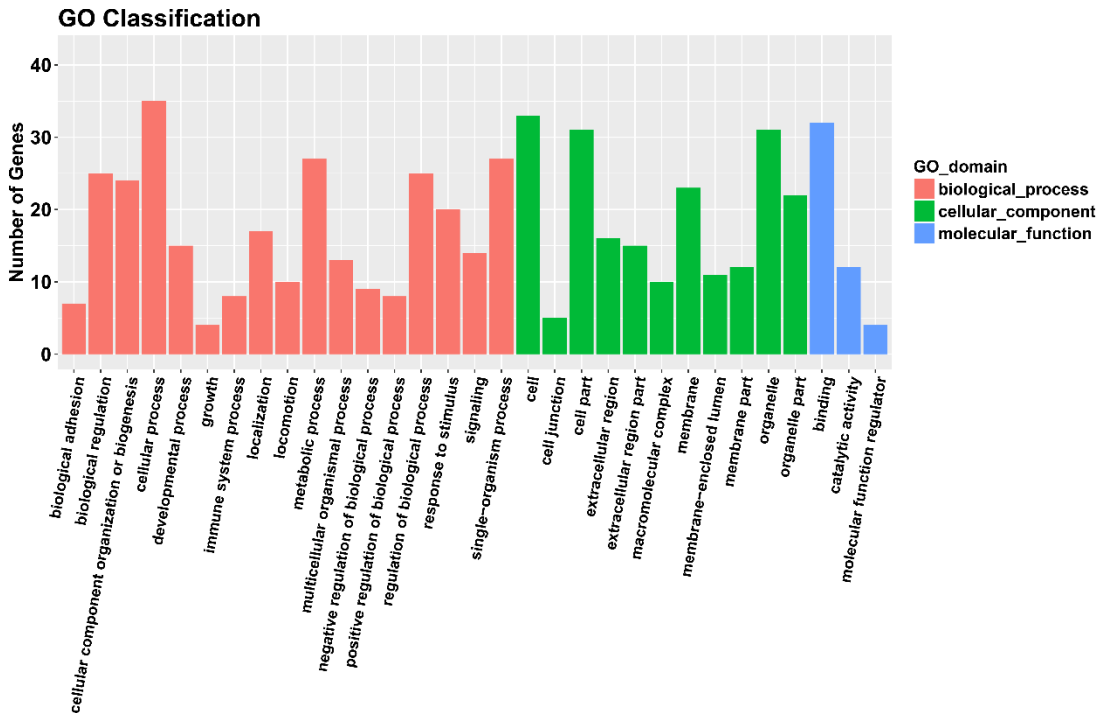

Figure S1. GO classification showed that the target genes of circRNAs are related to biological process.

**Figure S2.**

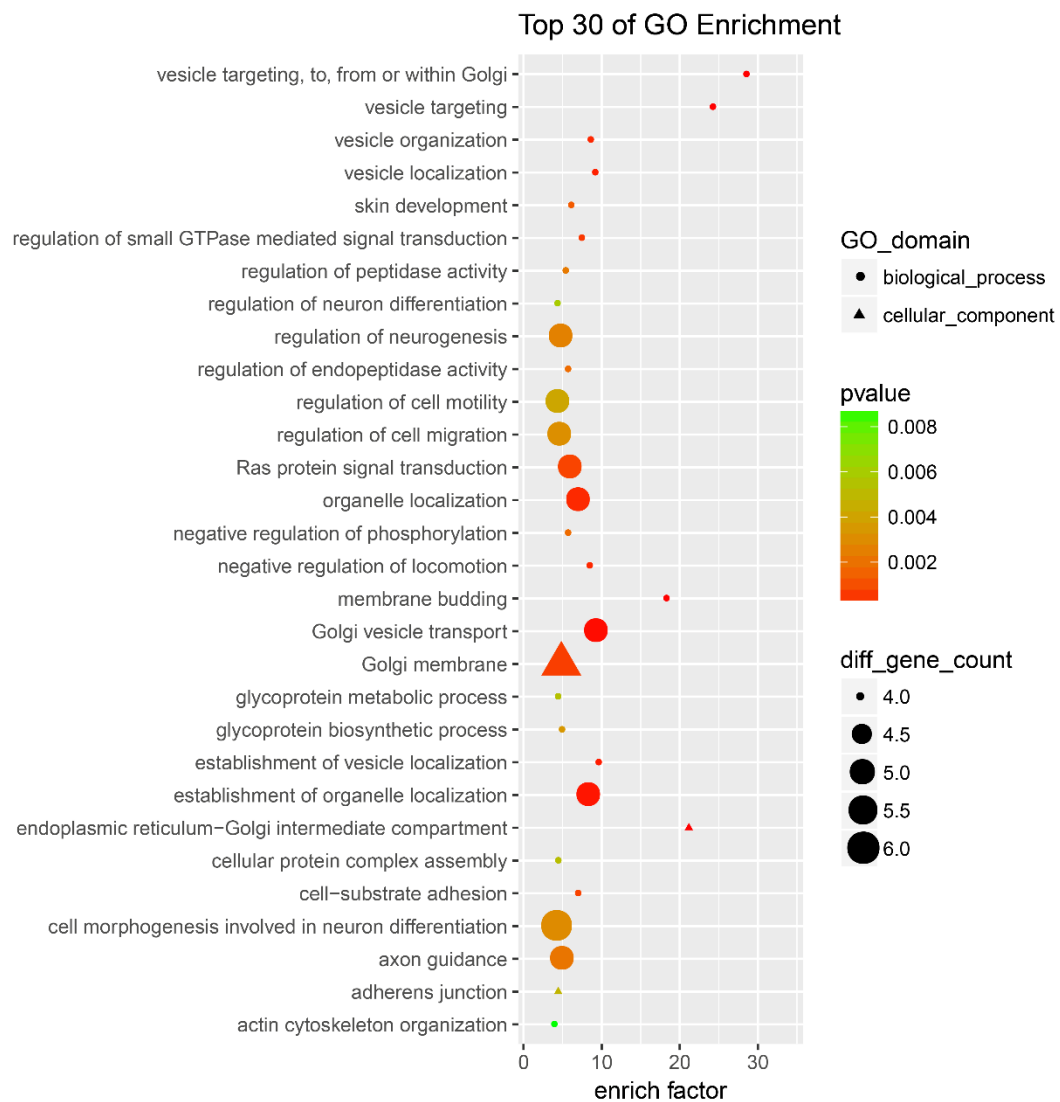

**Figure S2. Top 30 of GO Enrichment showed that the target genes of circRNAs are related to biological process including regulation of cell cycle, mitotic cell cycle, cell cycle and so on.**

Figure S3.

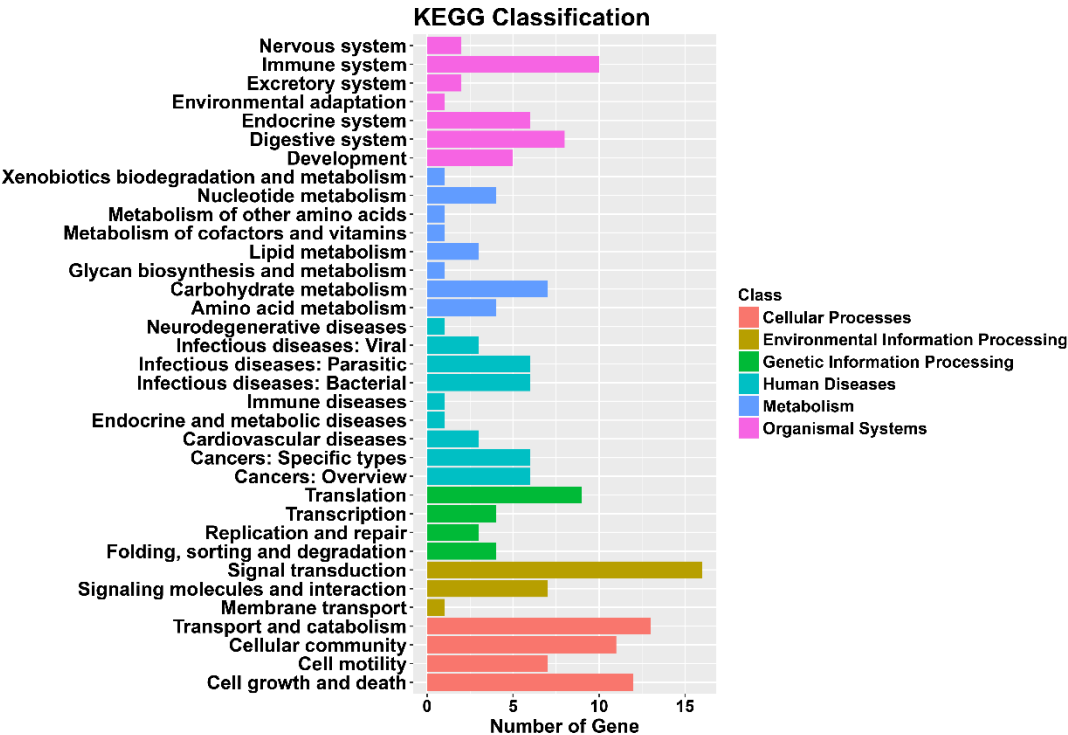

Figure S3. KEGG classification showed that the target genes of circRNAs are related to Cell growth and death.

**Figure S4.**

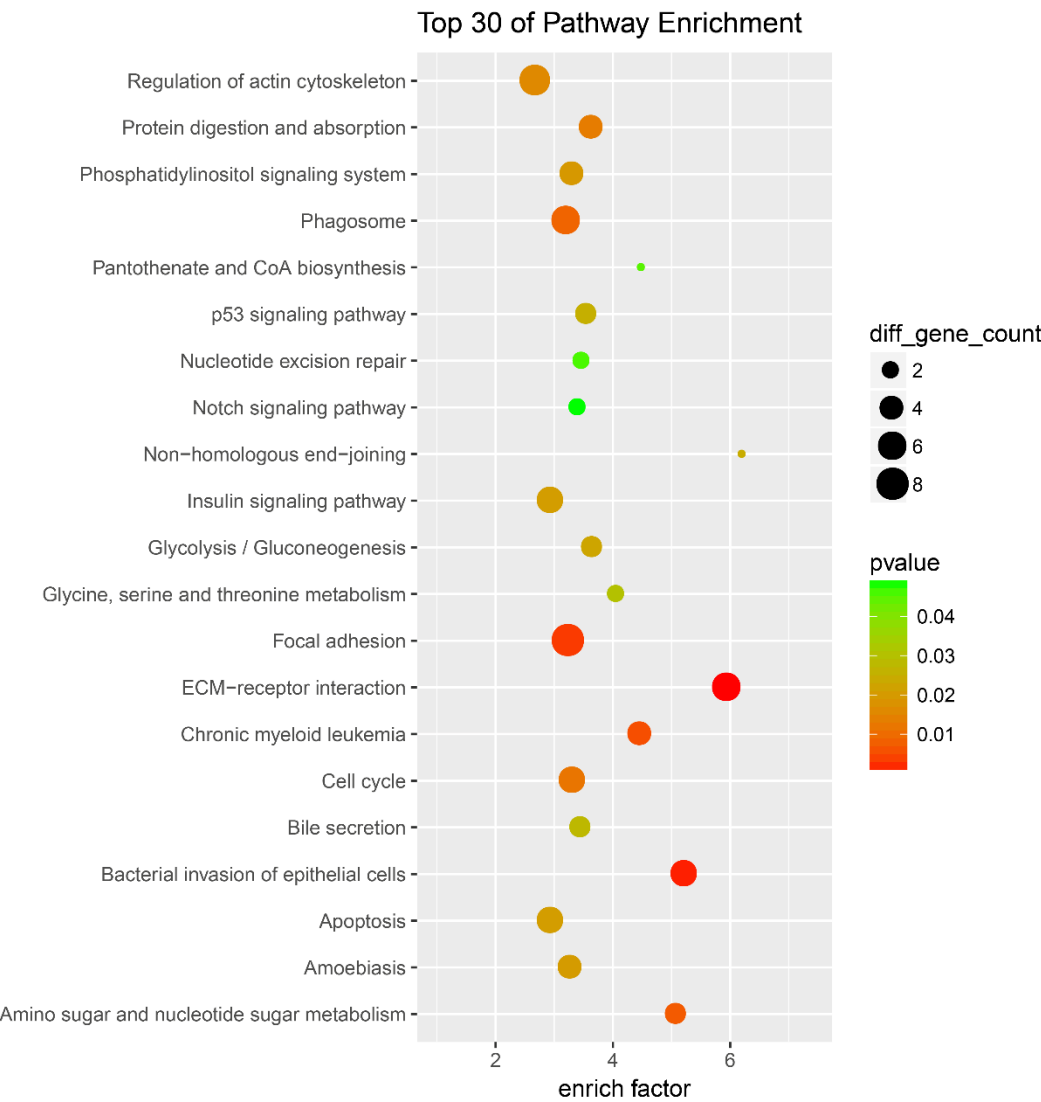

**Figure S4. Top 30 of Pathway Enrichment related to the target genes of circRNAs.**

**Figure S5.**

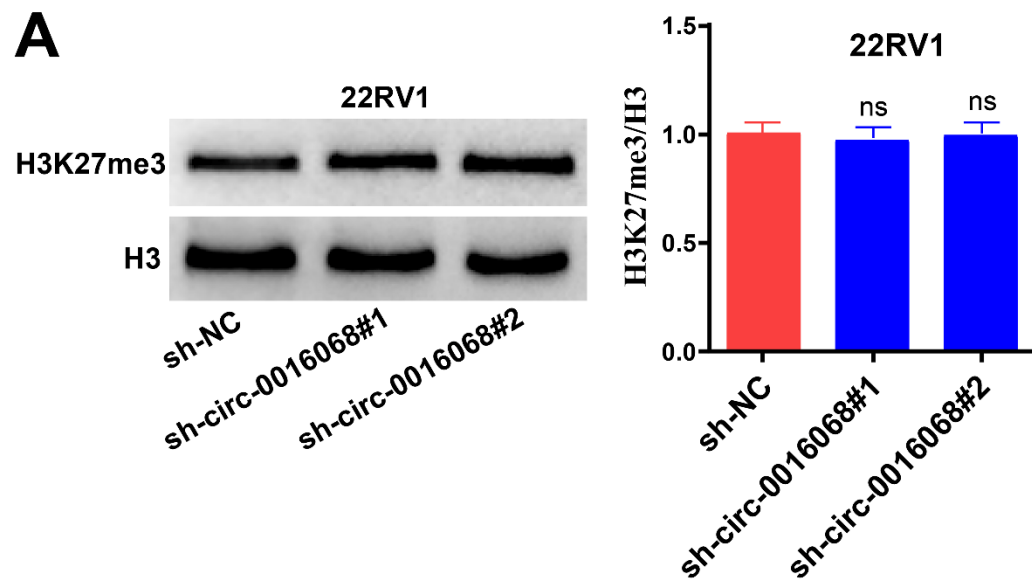

**Figure S5. The global level of H3K27me3 after depletion of circ-0016068.** (A) The global H3K27me3 levels keep unchanged after depletion of circ-0016068. Data represent the mean  $\pm$  SD. ns: no statistical significance.

**Figure S6.**

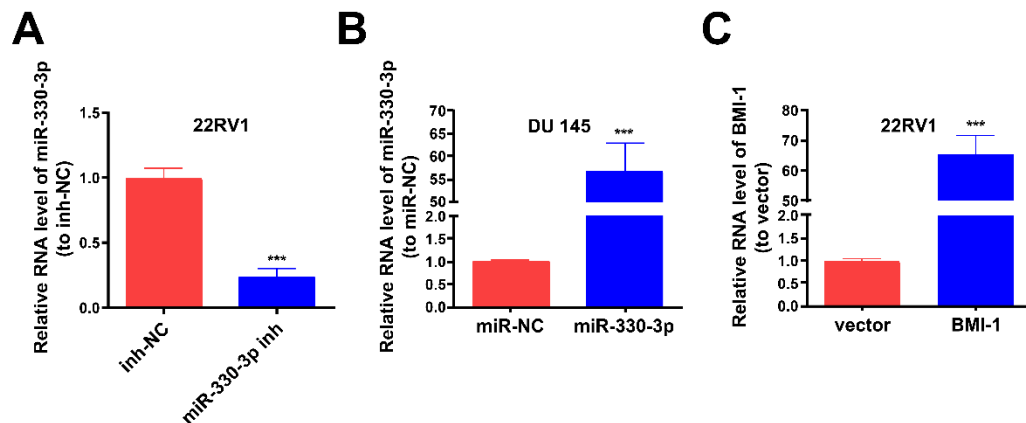

**Figure S6. Transfection efficiency.** (A) qRT-PCR detection of miR-330-3p in 22RV1 cells after transfected with inhibitor-NC and miR-330-3p inhibitor. (B) qRT-PCR detection of miR-330-3p in DU 145 cells after transfected with miR-NC and miR-330-3p mimics. (C) qRT-PCR detection of BMI-1 in 22RV1 cells after transfected with vector and BMI-1. Data represent the mean  $\pm$  SD. \*\*\* $P < 0.001$ .
